# Supplementary material
Source: publisher figshare collection journal article supplement (https://gsapubs.figshare.com/ndownloader/files/30712211)
Supplement: Supplementary file 1 [file 30712211]

## Sheet: Sheet1
Supplementary Table 4. Diatom counts for core 5 from Lake Izabal.
Depth (cm)	cal yr BP	Diatoms (counts)
		Aulacoseira spp (ringleiste)	Aulacoseira ambigua	Aulacoseira granulata	Aulacoseira cf nygaardi	Aulacosiera valida	Cyclotella quillensis	Discostella stelligera	Stephanodiscus sp (small)	Thalassiosira sp (small)	Chaetoceros sp (cyst)	Fragilariales	Pseudostaurosira brevistritata	Pseudostaurosira sp (cf brevistriata)	Staurosira constuens	Staurosira venter	Staurosirella pinnata	Staurosirella sp (cf africana)	Terpsinoe sp	Ulnaria sp	Monoraphid	Achnanthidium cf minutissimum	Achnanthidium (small football monoraphid)	Achnanthes cf inflata	Cocconies placentula?	Lemnicola sp	Planothidium sp oblong	Planothidium rostratum	Planothidium sp (rounded bow)	Eunotioid	Eunotia sp1 recurved arc	Eunotia sp 2 cf cumbres	Eunotia cf praerupta	Eunotia sp tiny arch	Eunotia sp tiny inch	Peronia sp?	Naviculoid	Brachysira sp small oval	Caloneis spp	Diadesmis cf contenta	Diploneis spp	Luticola sp (small oval)	Frustulia sp	Gyrosigma sp	Humidophila spp	Mastogloia sp	Navicula sp1	Navicula sp small boat	Navicula radiosa
0	-68	35	9	77	94		2	4	1				1	1	27	21	8	16					3																								1
20	114	95	4	124	8		3	1	1			5			11	25	8	14					2				2
40	299	58	5	101	18		7	1					2		3	67	26	20		1			5				3	1
60	478	69	6	124	40	1		17							1	13	14	8					1				4	1													1
75	617	68	1	104	14		3						4	1	8	39	19	21		1			4				4															2					1
100	845	31	7	232			3	13	16							2		2					2
120	1026	15	1	266			6	8	4							1		4					1				1
140	1209
160	1410
180	1639
200	1874
220	2105	48	7	239														4					2
240	2354	47	23	223														6
260	2619	4	5	267						1		2	2	1	2		4	5		1																					2
270	2754	35	2	244	1					2	1		1		5	1	3	3		1		1
280	2892	11	11	277										1	2			1
290	3023	9	4	286			1			1					10		1			1
300	3158	39	3	232			1	1	5					1	11		2	3								2
310	3308	19	6	265											5			4
320	3460	1		6											1
330	3609
340	3758
360	4073
380	4372
400	4674
420	4975
440	5287																		4
460	5591																		5
480	5903																		5
500	6242																		2
520	6580																		1
540	6921																		3
560	7238																		3
580	7449									2									4
590	7554																		2
600	7791									21									13																											1
610	8078																		3																				1
620	8368		4	1			1			133	5								2	1											1								2							1
630	8495												2						1	18					1						8	1	1	7	2		1		1		5		4						1
640	8601			1											3					2				1				1			1			1							1	1
650	8686														11	1	1			13								1					1		1				2		4		3	1			1	1
660	8747											2	4	1	11					3						1	1				4	1			1		2		2		9			1	6			2	8
680	8869		2												5					5			5		2				4		8	4				1		2			8	3	2	1				2
700	9004														5					4	4	7			2	2					4	2		1			1			2	4	1	2	1	5			5	3
720	9149
740	9307																																								1
760	9505
[truncated: 38 more columns]

## Sheet: G49296
Obrist-Farner, J., et al., 2021, New estimates of the magnitude of the sea-level jump during the 8.2 ka event: Geology, https://doi.org/10.1130/G49296.1
